# Supplementary material for: Robust composite film with high thermal conductivity and excellent mechanical properties by constructing a long-range ordered sandwich structure
Source: Royal Society of Chemistry journal article supplement (doi:10.1039/d2ta00975g), 2022-01-01
Supplement: d2ta00975g1.pdf [file d2ta00975g1.pdf]

## Support Information

### **Robust composite film with high thermal conductivity and excellent mechanical properties via constructing long-range ordered sandwich structure**

*Linhong Li<sup>1,2#</sup>, Maohua Li<sup>1#</sup>, Zihui Zhang<sup>3</sup>, Yue Qin<sup>1</sup>, Xiaoxue Shui<sup>1</sup>, Juncheng Xia<sup>1</sup>, Shaoyang Xiong<sup>1</sup>, Bo Wang<sup>1</sup>, Zhenbang Zhang<sup>1</sup>, Xianzhe Wei<sup>1</sup>, Xiangdong Kong<sup>1</sup>, Ping Gong<sup>1,2</sup>, Tao Cai<sup>1,2</sup> Zhongbin Pan<sup>4</sup>, Yong Li<sup>\*5</sup>, Jinchun Fan<sup>\*6</sup>, Cheng-Te Lin<sup>1,2</sup>, Nan Jiang<sup>1,2</sup>, Jinhong Yu<sup>\*1,2</sup>*

*<sup>1</sup>Ningbo Institute of Materials Technology and Engineering, Chinese Academy of Sciences, Ningbo, 315201, China.*

*<sup>2</sup>Center of Materials Science and Optoelectronics Engineering, University of Chinese Academy of Sciences, Beijing 100049, China.*

*<sup>3</sup>College of Earth and Environmental Sciences, Lanzhou University, Lanzhou, 730000, China.*

*<sup>4</sup>School of Materials Science and Chemical Engineering, Ningbo University, China.*

*<sup>5</sup>Key Laboratory of Cryogenics, Technical Institute of Physics and Chemistry, Chinese Academy of Sciences, Beijing 100190, China.*

*<sup>6</sup>School of Materials and Chemistry, University of Shanghai for Science and Technology, Shanghai 200093, China*

**\*Corresponding author, E-mail: [liyong1897@mail.ipc.ac.cn](mailto:liyong1897@mail.ipc.ac.cn) (Y. Li); [jcfan@usst.edu.cn](mailto:jcfan@usst.edu.cn) (J. Fan); [yujinhong@nimte.ac.cn](mailto:yujinhong@nimte.ac.cn) (J. Yu).**

**#Both authors are co-first authors and contributed equally to this work.**

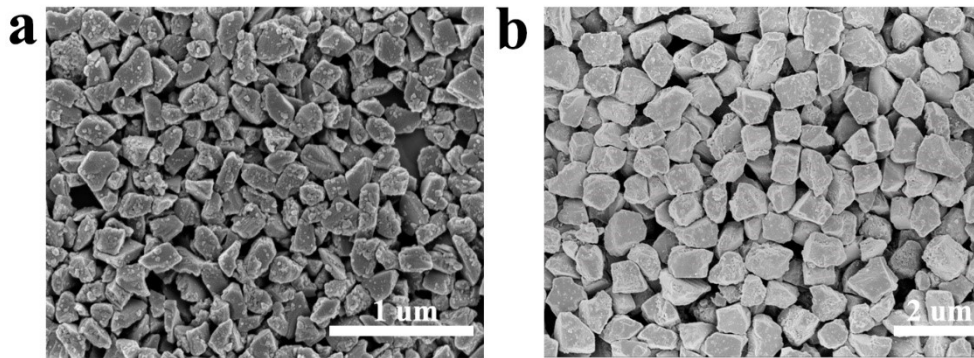

**Figure S1.** (a) The SEM image of nanodiamond; (b) The SEM image of microdiamond.

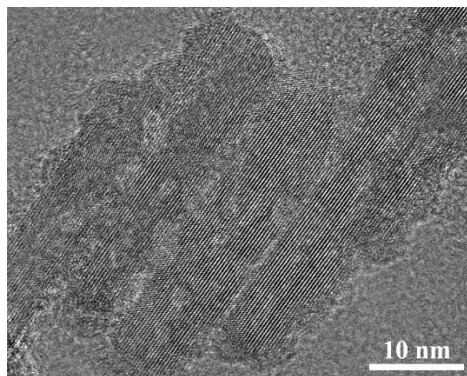

**Figure S2.** The edge lattice fringes characterization of BBNS.

**Table S1.** The average surface roughness of different composite films.

| Samples        | CNF-BNNS-hDB | CNF-BNNS-ND | CNF-BNNS-uD | CNF-BNNS-hD |
|----------------|--------------|-------------|-------------|-------------|
| Roughness (um) | 0.894        | 0.347       | 0.349       | 0.244       |

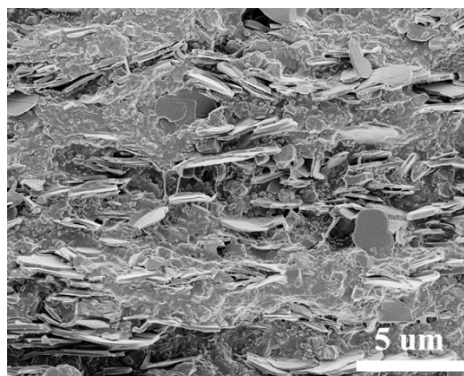

**Figure S3.** The cross-section image of CNF-BNNS-hDB composite.

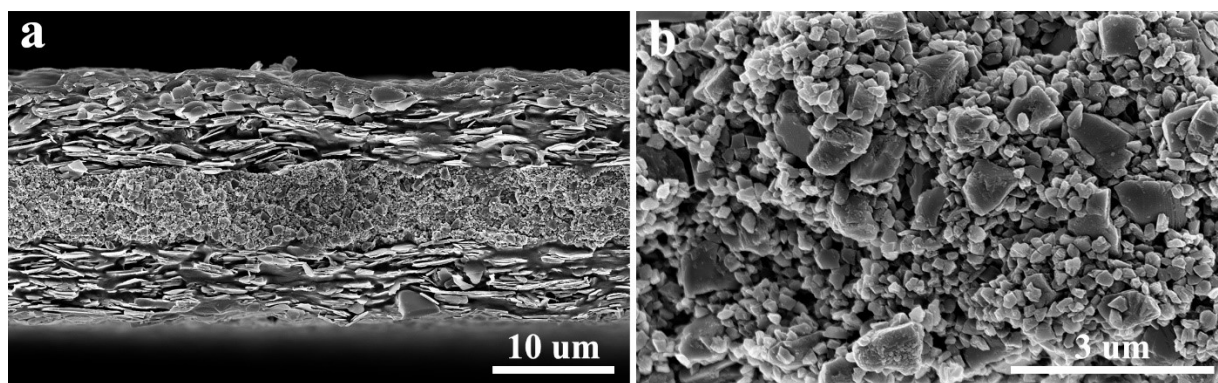

**Figure S4.** (a) The cross-section image of CNF-BNNS-hD composites film; (b) The partial enlarged image of diamond layer.

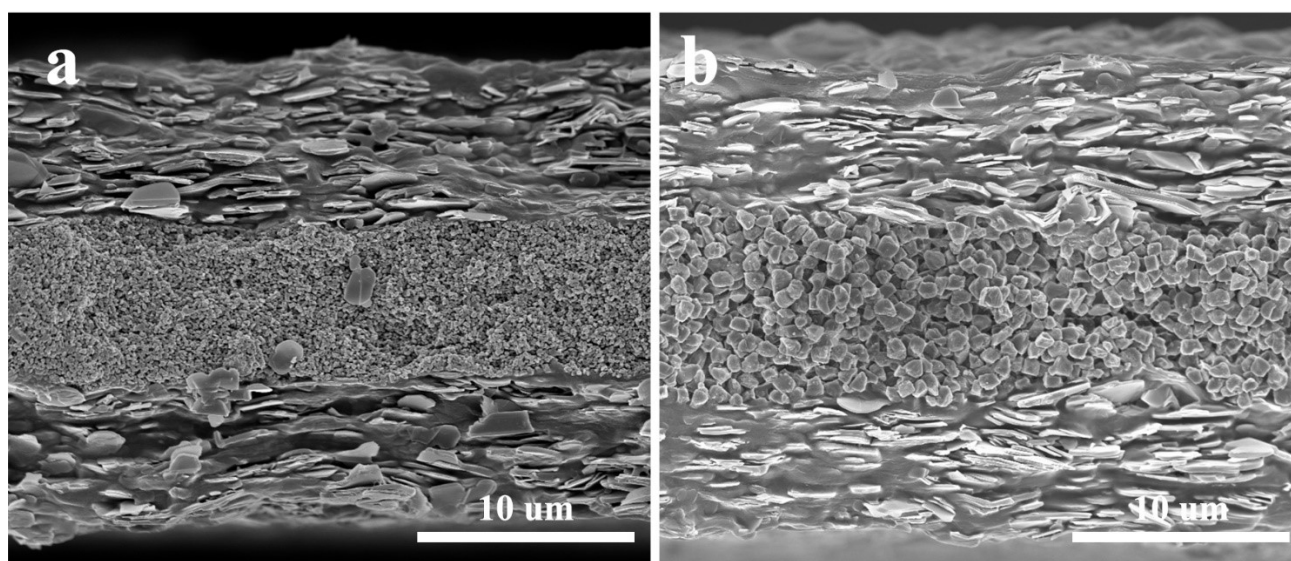

**Figure S5.** (a) The cross-section image of CNF-BNNS-ND composites film; (b) The cross-section image of CNF-BNNS-uD composites film.

**Table S2.** The density of different composite films.

| Samples                      | CNF-BNNS-hDB | CNF-BNNS-ND | CNF-BNNS-uD | CNF-BNNS-hD |
|------------------------------|--------------|-------------|-------------|-------------|
| Density (g/cm <sup>3</sup> ) | 1.77         | 1.89        | 1.94        | 2.01        |

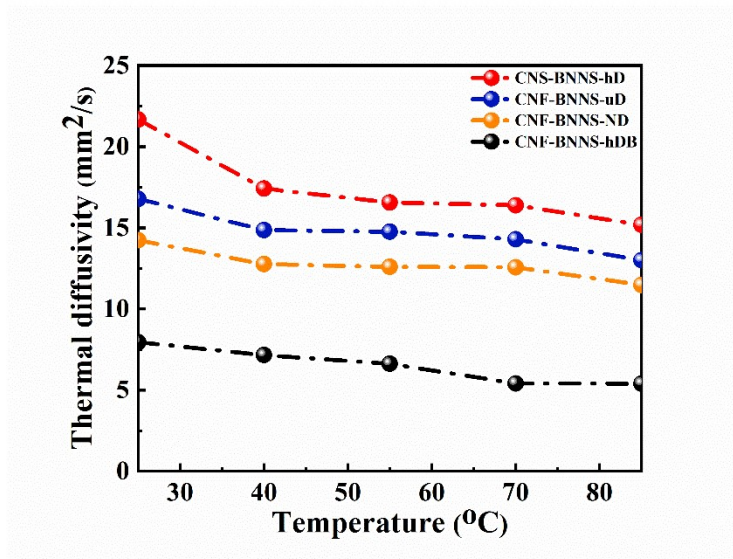

Figure S6. The thermal diffusivity of different composite film.

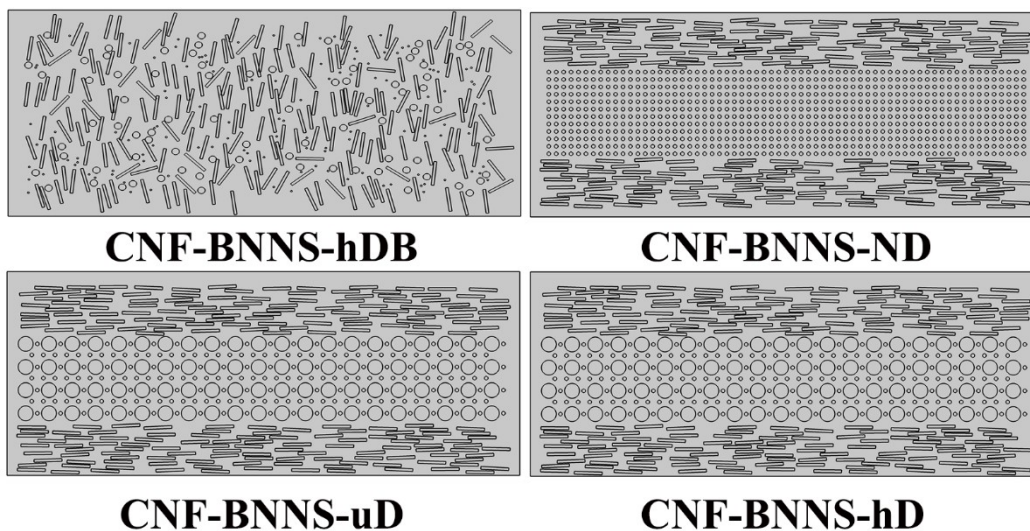

Figure S7. The calculated model of different composite films.

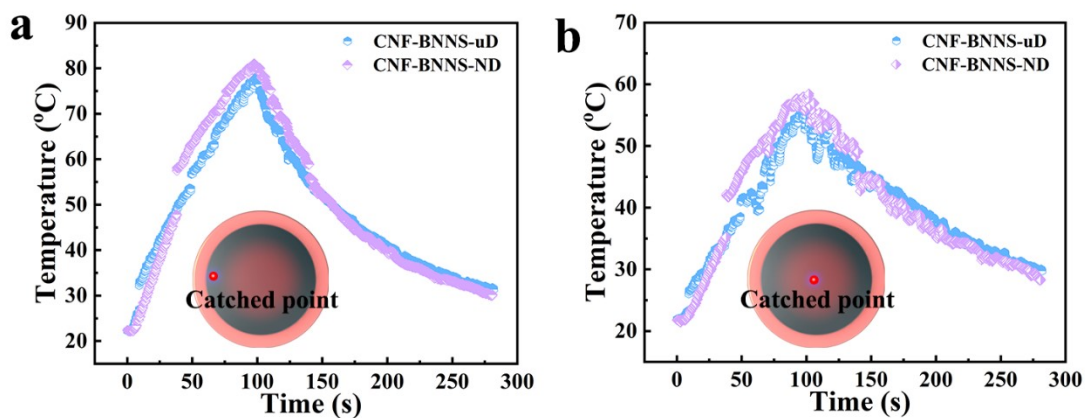

Figure S8. The temperature of the edge (a) and center (b) point of the CNF-BNNS-uD and CNF-BNNS-ND films.

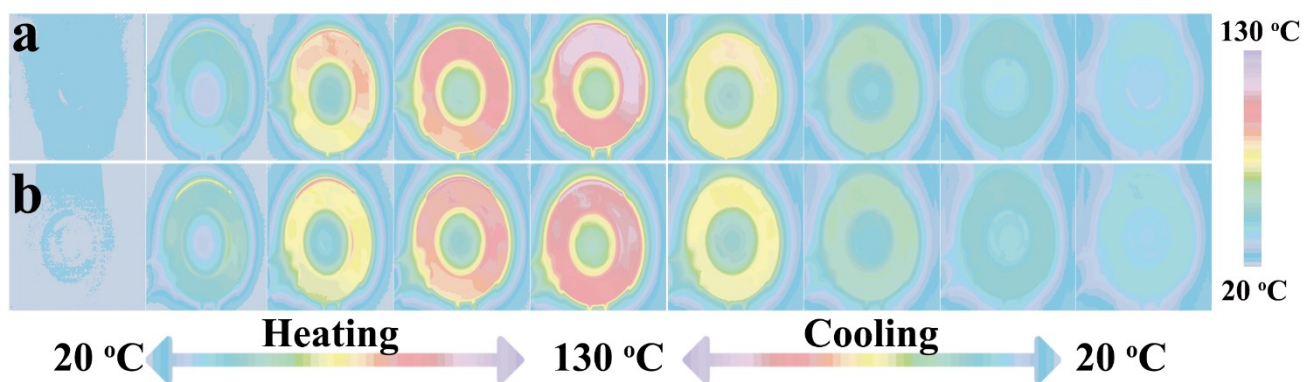

**Figure S9.** (a) and (b) The isotherm images of CNF-BNNS-uD and CNF-BNNS-ND films, respectively.
